# Supplementary material for: Application of long read sequencing to determine expressed antigen diversity in Trypanosoma brucei infections
Source: PubMed Central journal article supplement (PMC6464242; doi:10.1371/journal.pntd.0007262), 2019-04-03

Tb08.27P2.380  
 BALBC|day10/3\_4  
 BALBC|day10/3\_6  
 BALBC|day3/5\_2  
 BALBC|day3/5\_5  
 BALBC|day3/5\_6

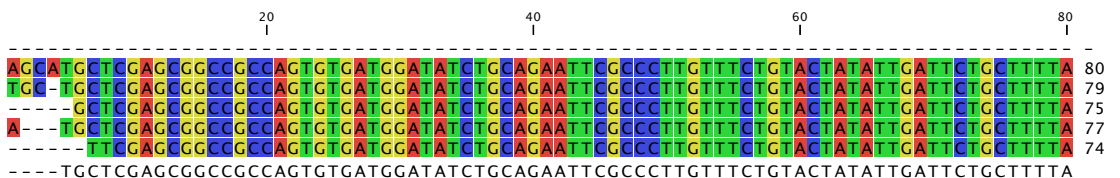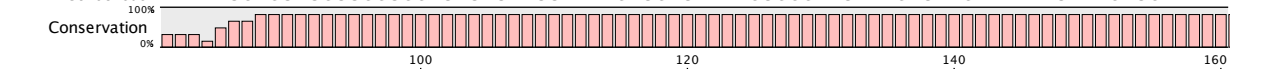

Tb08.27P2.380  
 BALBC|day10/3\_4  
 BALBC|day10/3\_6  
 BALBC|day3/5\_2  
 BALBC|day3/5\_5  
 BALBC|day3/5\_6

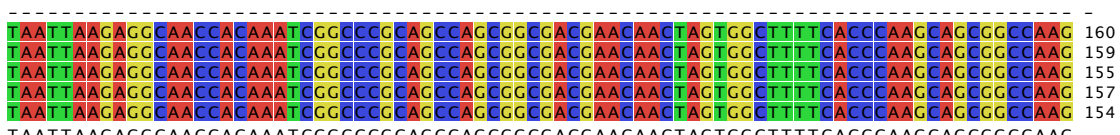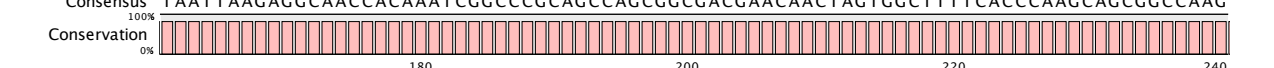

Tb08.27P2.380  
 BALBC|day10/3\_4  
 BALBC|day10/3\_6  
 BALBC|day3/5\_2  
 BALBC|day3/5\_5  
 BALBC|day3/5\_6

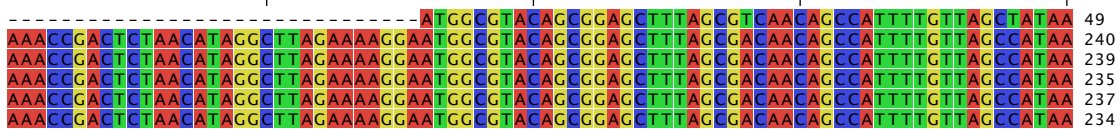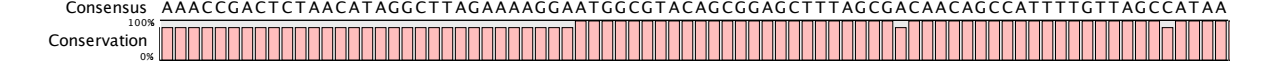

Tb08.27P2.380  
 BALBC|day10/3\_4  
 BALBC|day10/3\_6  
 BALBC|day3/5\_2  
 BALBC|day3/5\_5  
 BALBC|day3/5\_6

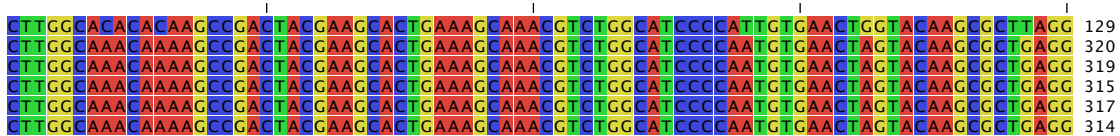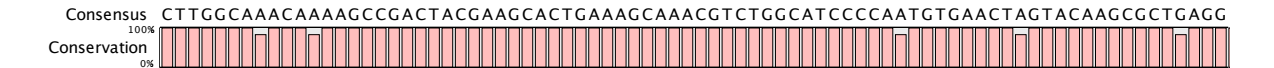

Tb08.27P2.380  
 BALBC|day10/3\_4  
 BALBC|day10/3\_6  
 BALBC|day3/5\_2  
 BALBC|day3/5\_5  
 BALBC|day3/5\_6

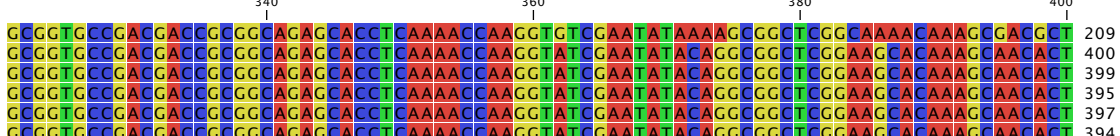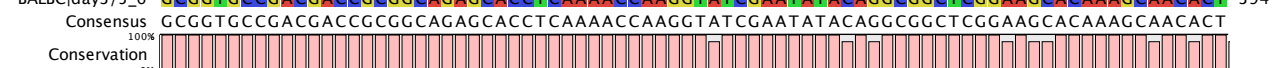

Tb08.27P2.380  
 BALBC|day10/3\_4  
 BALBC|day10/3\_6  
 BALBC|day3/5\_2  
 BALBC|day3/5\_5  
 BALBC|day3/5\_6

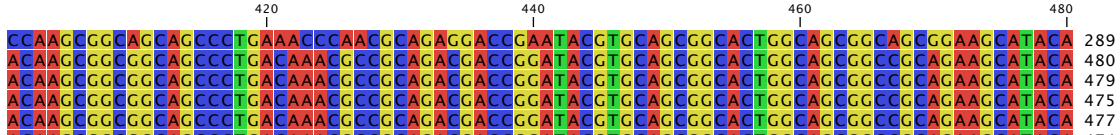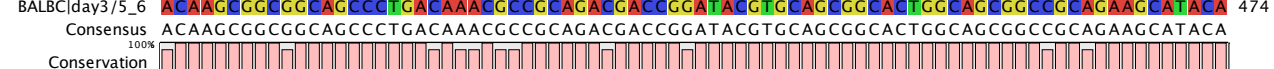

Tb08.27P2.380  
 BALBC|day10/3\_4  
 BALBC|day10/3\_6  
 BALBC|day3/5\_2  
 BALBC|day3/5\_5  
 BALBC|day3/5\_6

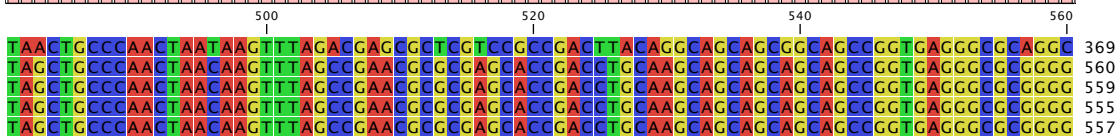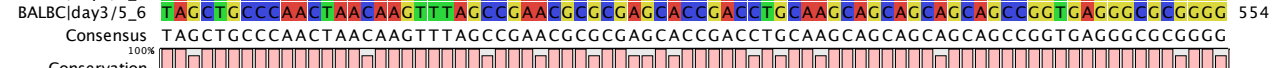

Tb08.27P2.380  
 BALBC|day10/3\_4  
 BALBC|day10/3\_6  
 BALBC|day3/5\_2  
 BALBC|day3/5\_5  
 BALBC|day3/5\_6

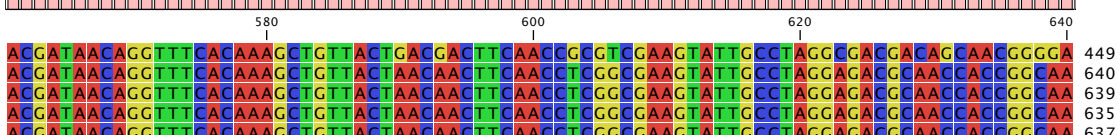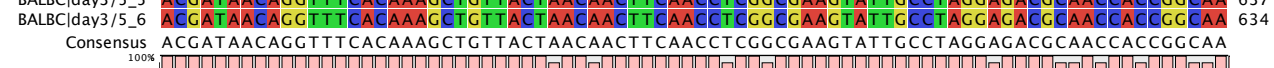

Sample 1 to 5

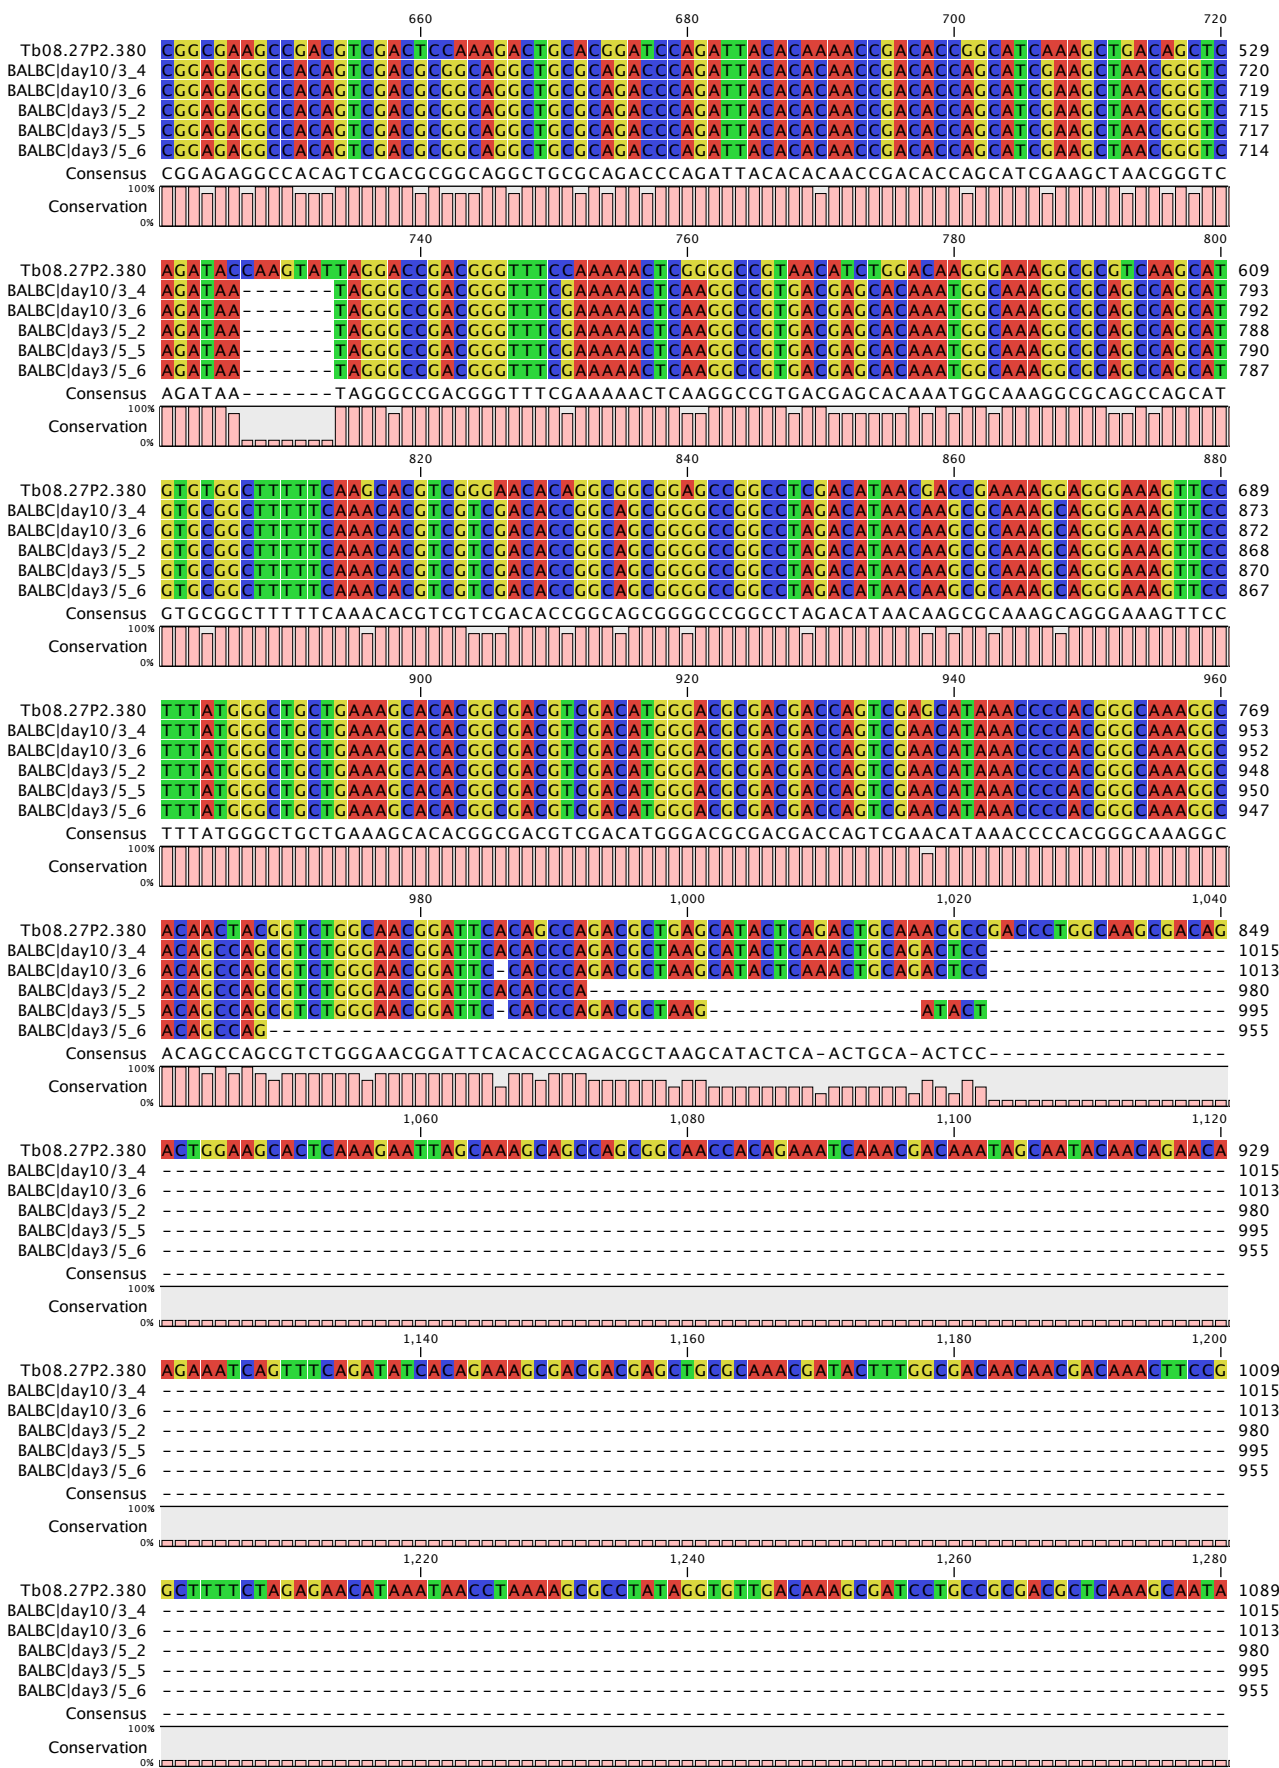

Sample 1 to 5

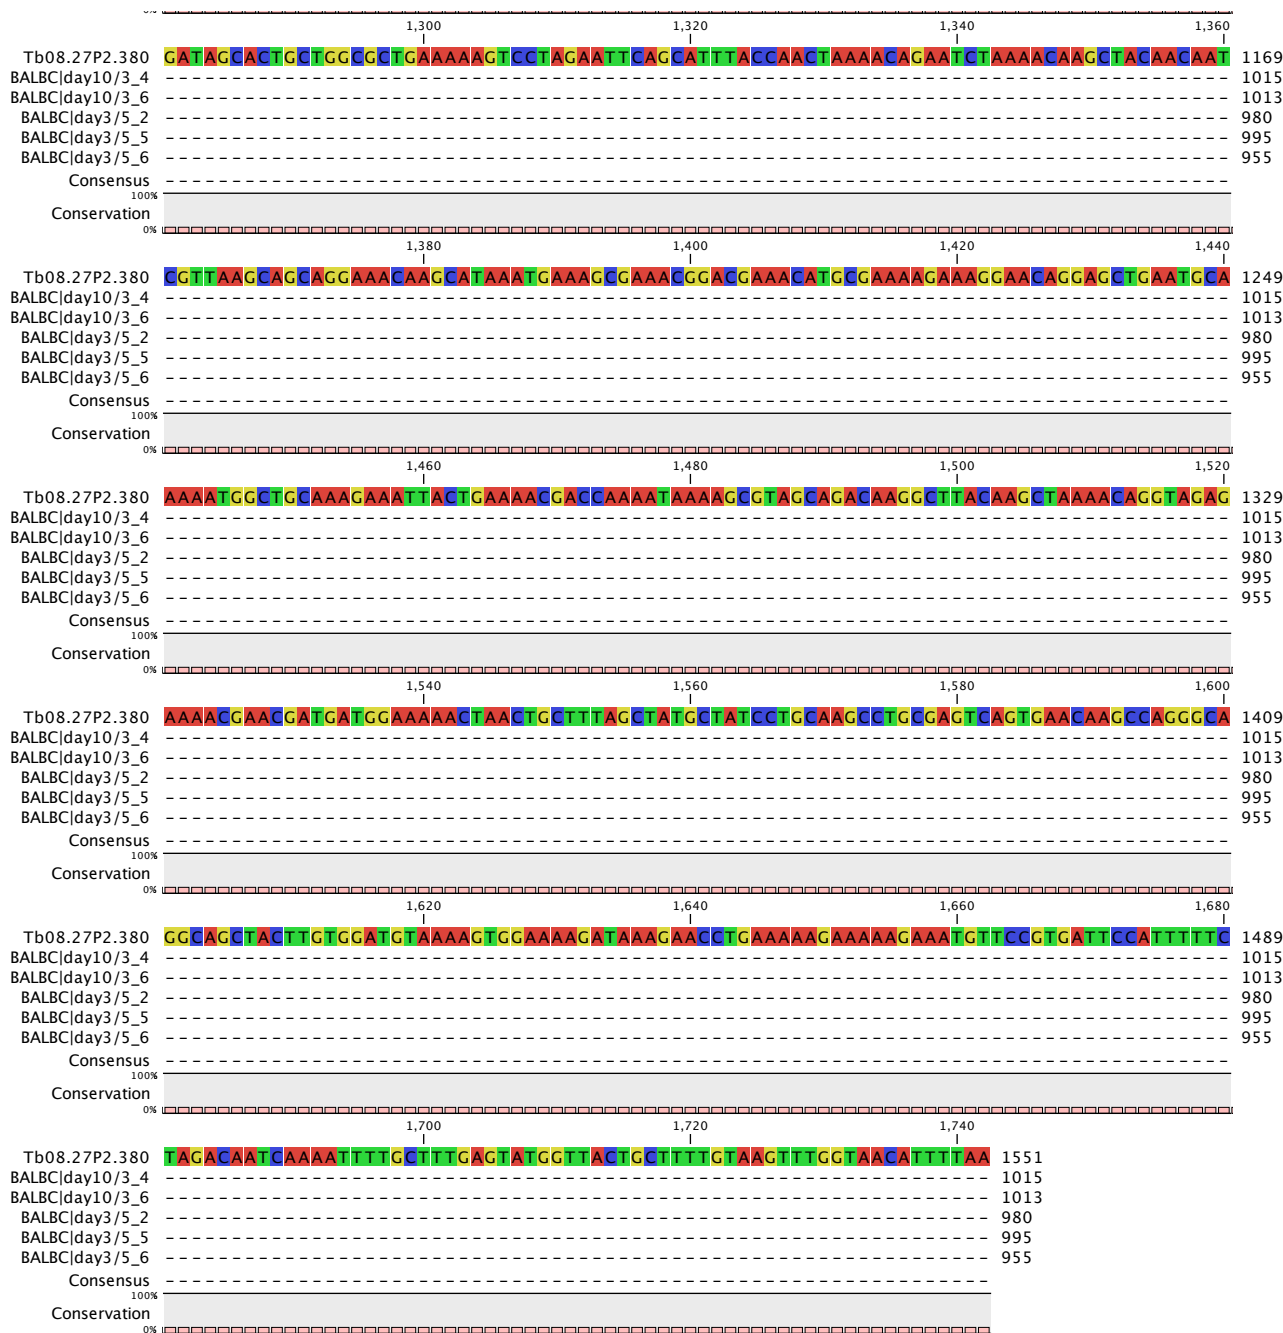

Sample 1 to 5

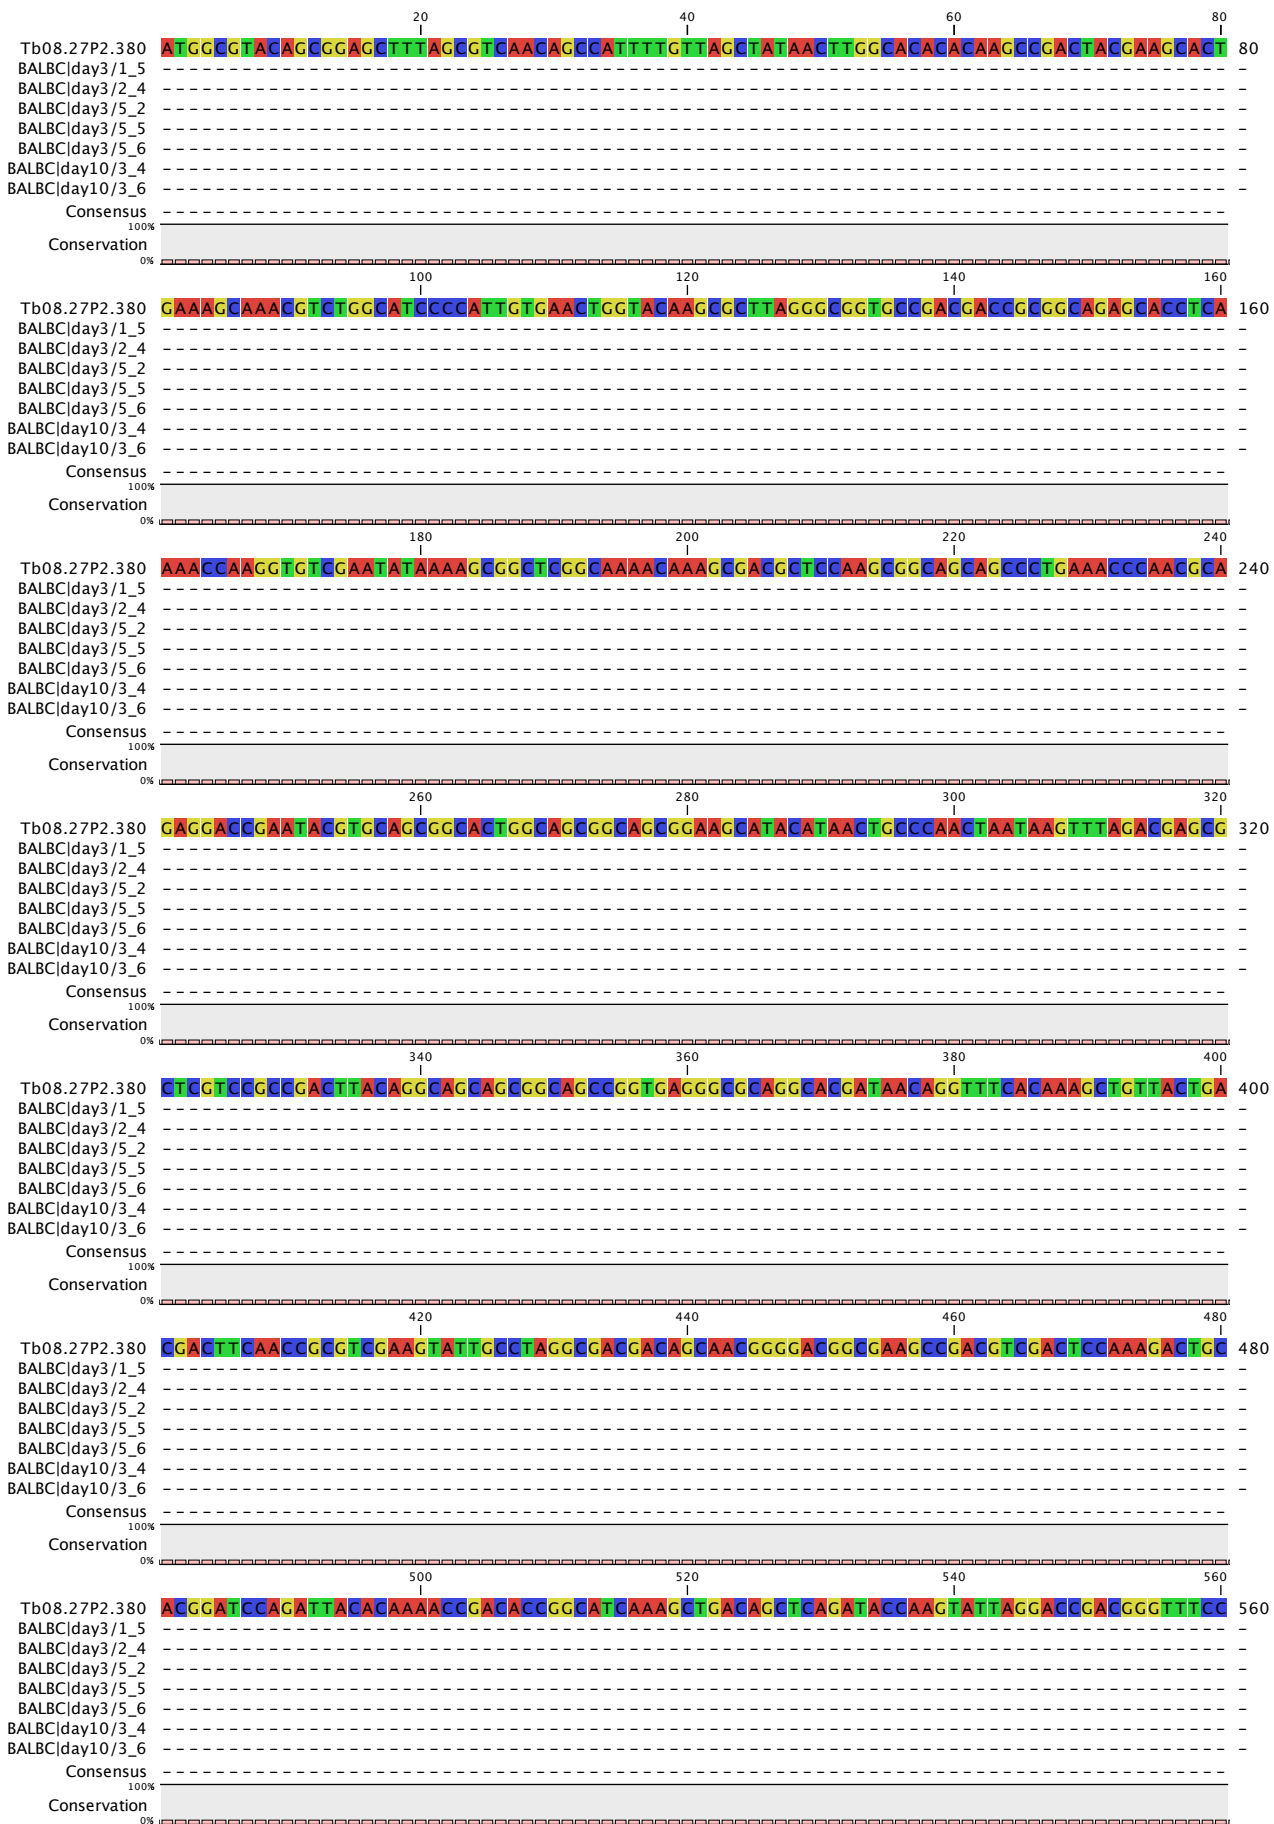

Sample 6 to 12

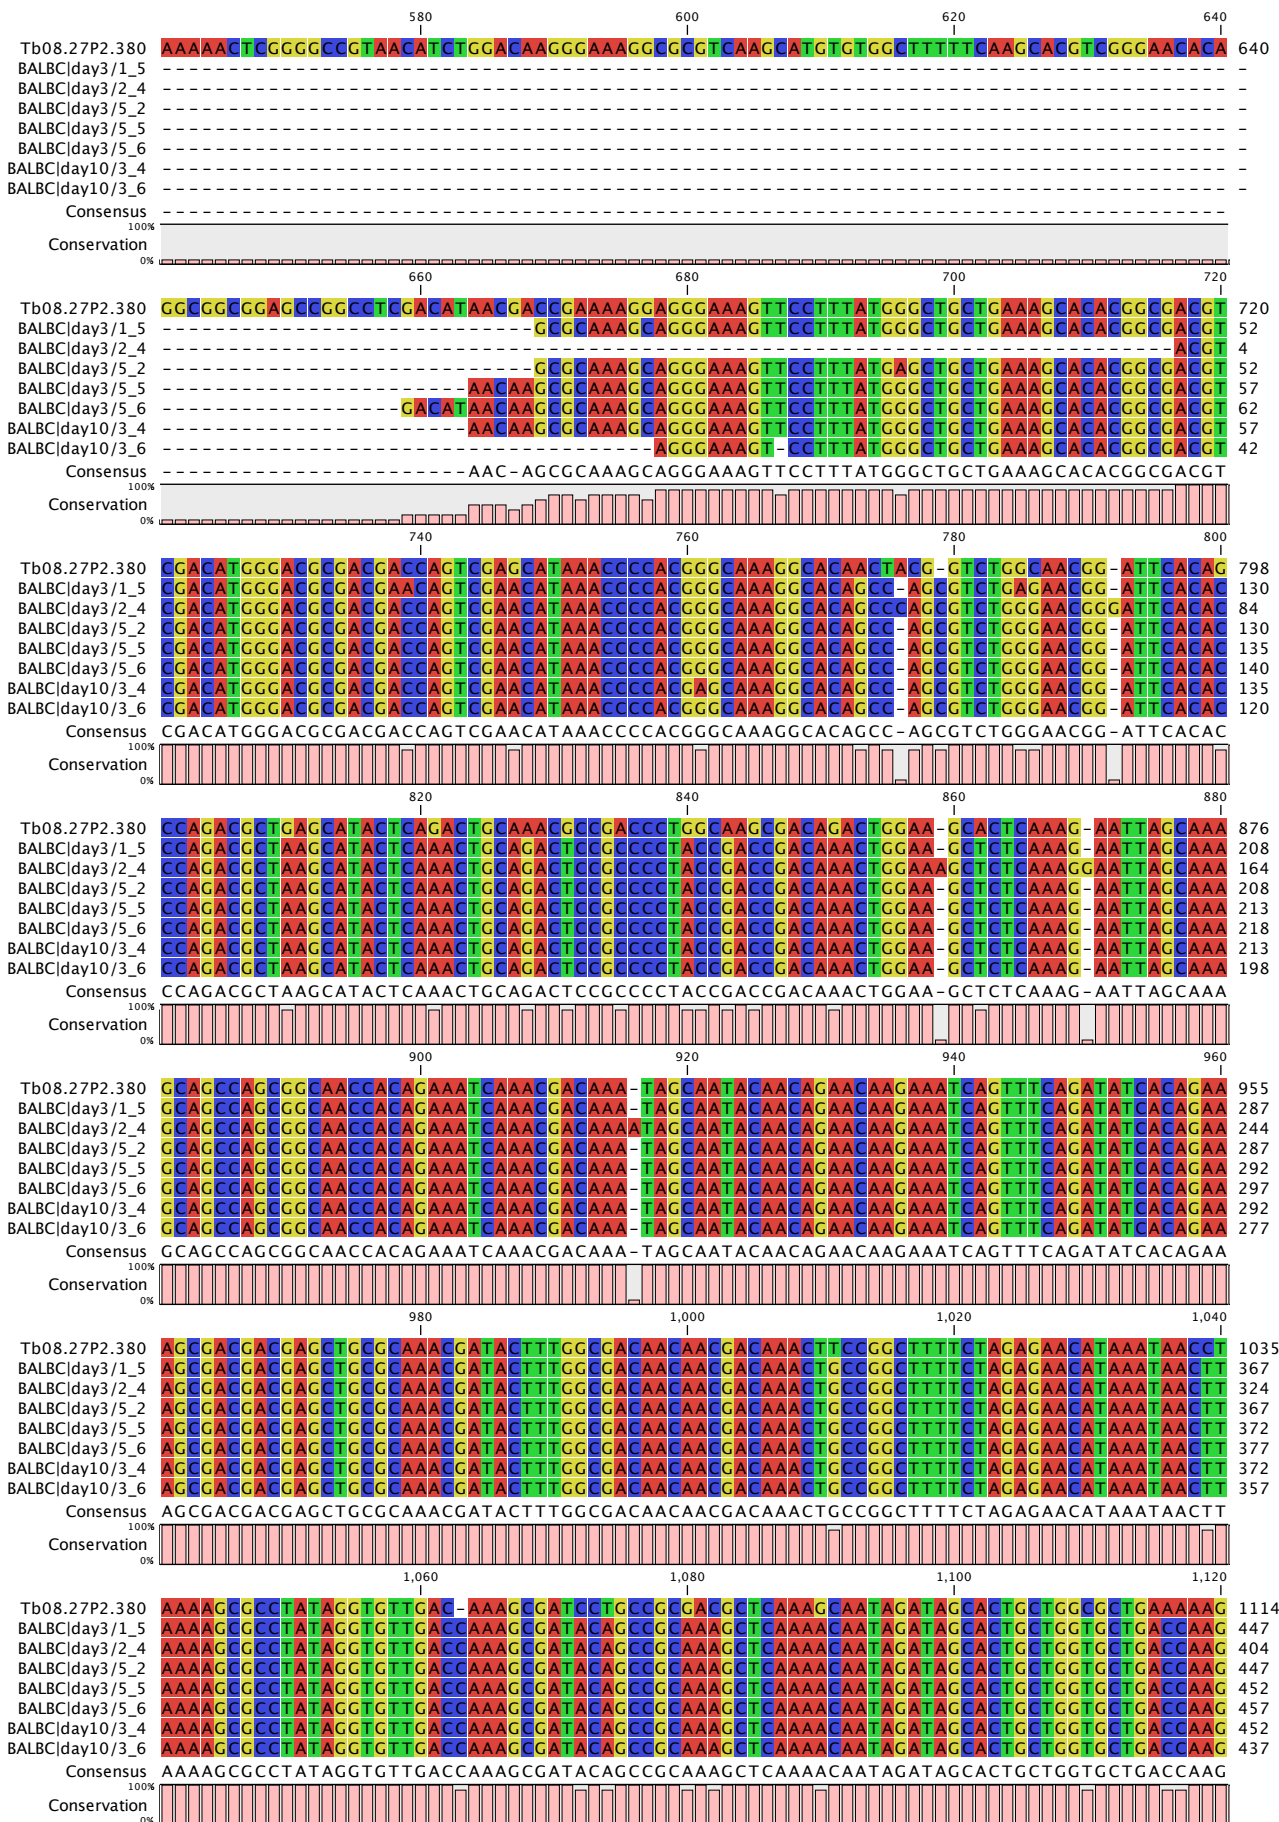

Sample 6 to 12

Tb08.27P2.380  
 BALBC|day3/1\_5  
 BALBC|day3/2\_4  
 BALBC|day3/5\_2  
 BALBC|day3/5\_5  
 BALBC|day3/5\_6  
 BALBC|day10/3\_4  
 BALBC|day10/3\_6

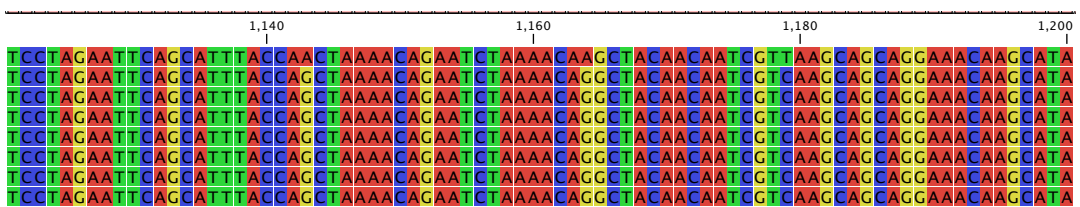

1194  
527  
484  
527  
532  
537  
532  
517

Consensus TCCTAGAATT CAGCATTT ACCAGCTAAAACAGAACTCTAAAACAGGCTACAACAATCGTCAAGCAGCAGGAAACAAGCATA  
 Conservation 100%  
 0%

Tb08.27P2.380  
 BALBC|day3/1\_5  
 BALBC|day3/2\_4  
 BALBC|day3/5\_2  
 BALBC|day3/5\_5  
 BALBC|day3/5\_6  
 BALBC|day10/3\_4  
 BALBC|day10/3\_6

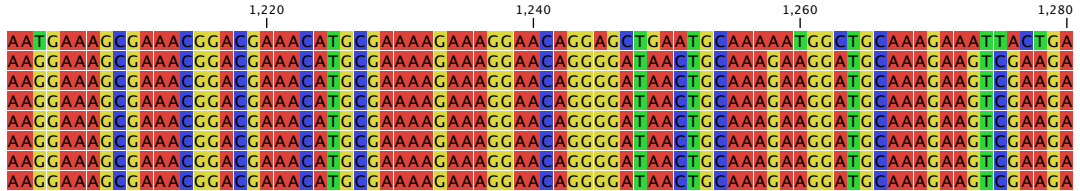

1274  
607  
564  
607  
612  
617  
612  
597

Consensus AAGGAAAGCGAAACGGACGAAACATGCGAAAAGAAAGGAAACAGGGGATAACTGCAAAGAAAGGATGCAAAGAAGTCGAAGA  
 Conservation 100%  
 0%

Tb08.27P2.380  
 BALBC|day3/1\_5  
 BALBC|day3/2\_4  
 BALBC|day3/5\_2  
 BALBC|day3/5\_5  
 BALBC|day3/5\_6  
 BALBC|day10/3\_4  
 BALBC|day10/3\_6

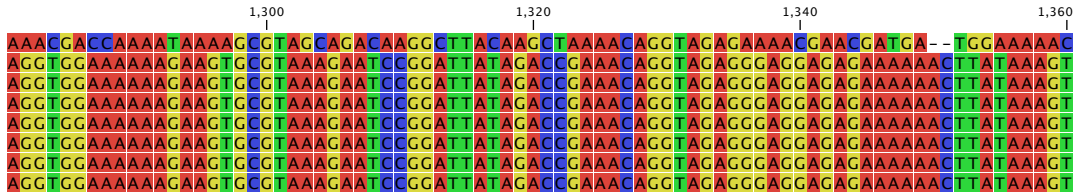

1352  
687  
644  
687  
692  
697  
692  
677

Consensus AGGTGGAAAAAAGAAGTGGCTAAAGAATCCGGATTATAGACCGAAACAGGTAGAGGGAGGAGAAAAAAGTTATAAAGT  
 Conservation 100%  
 0%

Tb08.27P2.380  
 BALBC|day3/1\_5  
 BALBC|day3/2\_4  
 BALBC|day3/5\_2  
 BALBC|day3/5\_5  
 BALBC|day3/5\_6  
 BALBC|day10/3\_4  
 BALBC|day10/3\_6

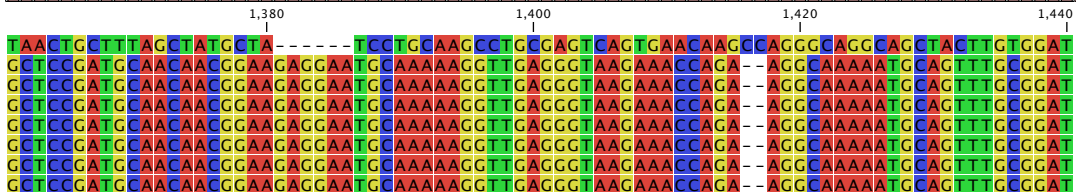

1426  
765  
722  
765  
770  
775  
770  
755

Consensus GCTCCGATGCAACAACGGAAAGAGGAATGCAAAAAGGTTGAGGGTAAGAAACCAGAA--AGGCAAAAATGCAGTTTGGGAT  
 Conservation 100%  
 0%

Tb08.27P2.380  
 BALBC|day3/1\_5  
 BALBC|day3/2\_4  
 BALBC|day3/5\_2  
 BALBC|day3/5\_5  
 BALBC|day3/5\_6  
 BALBC|day10/3\_4  
 BALBC|day10/3\_6

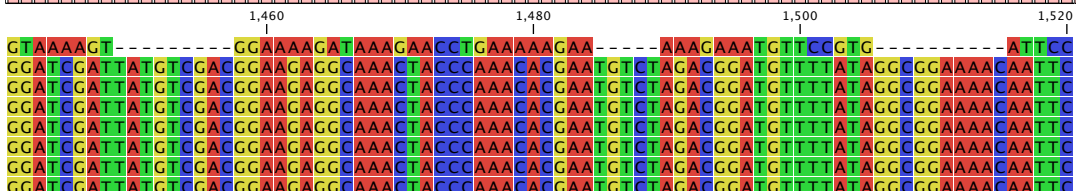

1482  
845  
802  
845  
850  
855  
850  
835

Consensus GGATCGATTATGTGACGGAAAGAGGCAAACTACCCAAACAGGAATGTCTAGACGGATGTTTTATAGGCGGAAAAACAATTC  
 Conservation 100%  
 0%

Tb08.27P2.380  
 BALBC|day3/1\_5  
 BALBC|day3/2\_4  
 BALBC|day3/5\_2  
 BALBC|day3/5\_5  
 BALBC|day3/5\_6  
 BALBC|day10/3\_4  
 BALBC|day10/3\_6

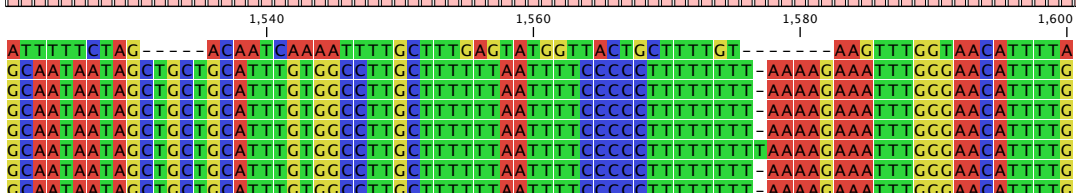

1550  
924  
881  
924  
929  
935  
929  
914

Consensus GCAATAATAGCTGCTGCAATTTGTGGCCTTGCTTTTTAAATTTCCCCCTTTTTTTT-AAAAGAAAATTTGGGAACATTTTG  
 Conservation 100%  
 0%

Tb08.27P2.380  
 BALBC|day3/1\_5  
 BALBC|day3/2\_4  
 BALBC|day3/5\_2  
 BALBC|day3/5\_5  
 BALBC|day3/5\_6  
 BALBC|day10/3\_4  
 BALBC|day10/3\_6

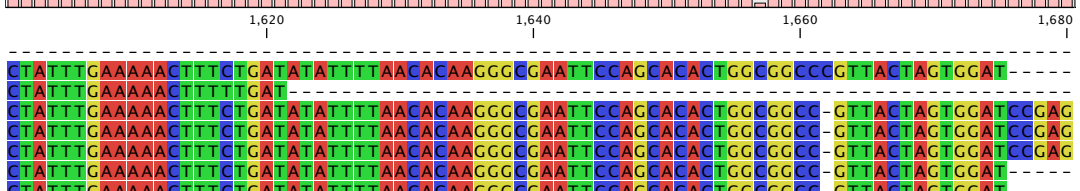

1550  
999  
902  
1003  
1008  
1014  
1003  
988

Consensus CTATTTGAAAAACTTTCTGATATATTTTAAACAAGGGCGAATTCAGCACACTGGCGGCC-GTTACTAGTGGAT  
 Conservation 100%  
 0%

---

Tb08.27P2.380 -- **A** 1551  
BALBC|day3/1\_5 --- 999  
BALBC|day3/2\_4 --- 902  
BALBC|day3/5\_2 **CT** 1005  
BALBC|day3/5\_5 **CTC** 1011  
BALBC|day3/5\_6 **CTC** 1017  
BALBC|day10/3\_4 --- 1003  
BALBC|day10/3\_6 --- 988  
Consensus ---  
100%  
Conservation 0% 

Supplement: pntd.0007262.s004.pdf [file pntd.0007262.s004.pdf]
