# Supplementary material for: Application of long read sequencing to determine expressed antigen diversity in Trypanosoma brucei infections
Source: PubMed Central journal article supplement (PMC6464242; doi:10.1371/journal.pntd.0007262), 2019-04-03

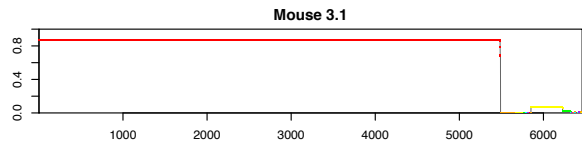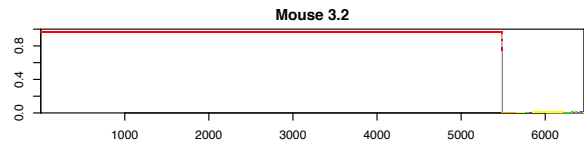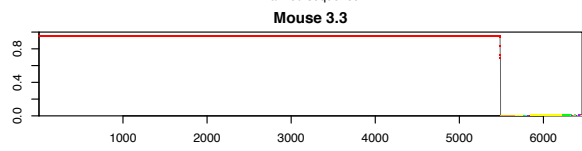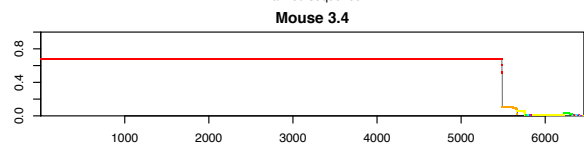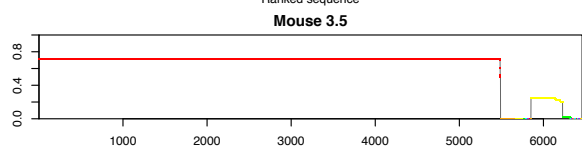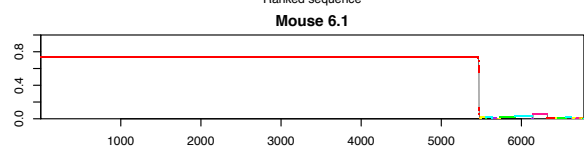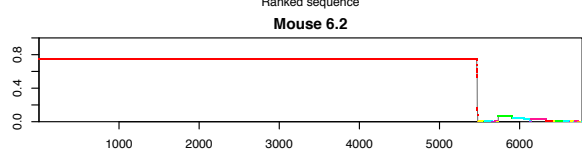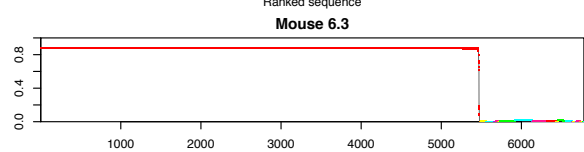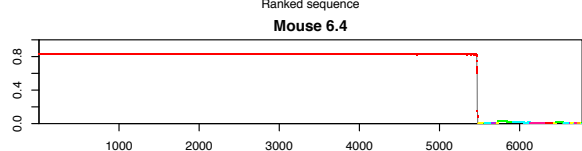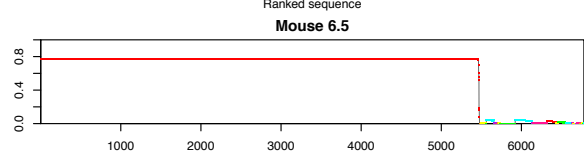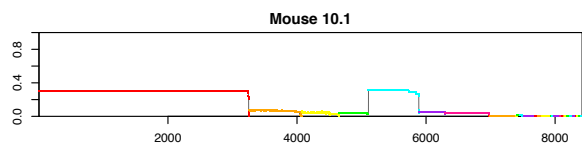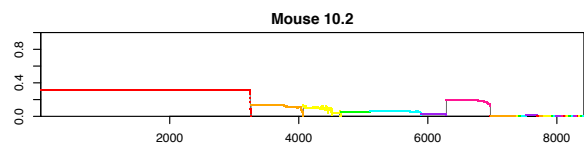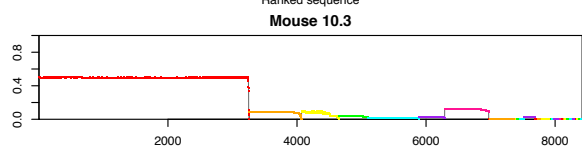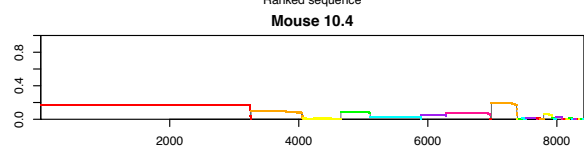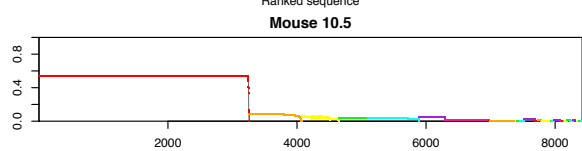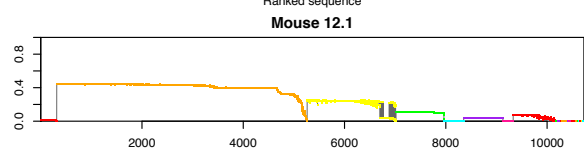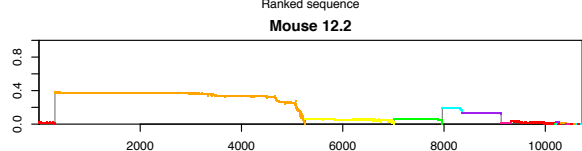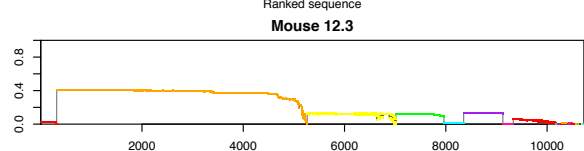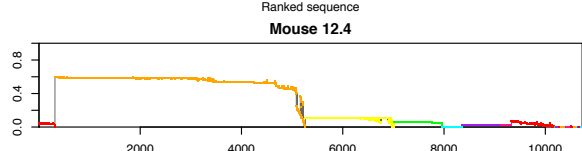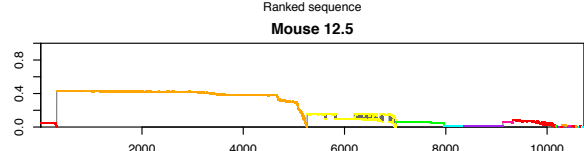

Supplement: pntd.0007262.s006.pdf [file pntd.0007262.s006.pdf]
